# Supplementary material for: Ecological analysis of mosquito larval communities in Burkina Faso to inform environmental monitoring of genetic control programs
Source: Sci Rep. 2026 Jan 13;16:5091. doi: 10.1038/s41598-026-35602-6 (PMC12877188; doi:10.1038/s41598-026-35602-6)
Supplement: Supplementary file 3 — Supplementary Material 3 [file 41598_2026_35602_MOESM3_ESM.xlsx]

## Sheet: Data_all
Date	Period	Locality	Site	Hour	Gite number	Temperature	pH	Turbidity	Oxygen	Conductivity	Length	Size Class	Ladles number	Habitat_type	Breeding_site	Permanance	Vegetation	Algue	Presence NTOs	NTOs number	Pupae	Anopheles L1	Anopheles L2	Anopheles L3	Anopheles L4	Anopheles sp	Anopheles coluzzii	Anopheles gambiae s.s.	Anopheles arabiensis	Hybrid	Anopheles ND	Aedes sp	Culex sp	Corixidae	Dytiscidae	Hydrophilidae	Baetidae	Nepidae	Libellulidae
2024-07-16	Beginning	Burkina-Faso	Soumousso	09h45 12h26	6	24.2	7.05	755	8	79.4	23.2	Large	6	Pond	Ponds	Intermediate	Yes	No	Yes	7	No	NA	NA	60	30	90	7	6	7	0	0	0	0	7	0	0	0	0	0
2024-07-16	Beginning	Burkina-Faso	Soumousso	09h45 12h26	7	24.49	7.84	107	13.1	0.204	2	Medium	4	Tyre tracks	Tyre tracks	Short	Yes	Yes	No	0	No	NA	NA	15	0	15	4	6	3	2	0	0	0	0	0	0	0	0	0
2024-07-16	Beginning	Burkina-Faso	Soumousso	09h45 12h26	8	25.1	7.47	644	7.8	156.1	2.85	Medium	4	Tyre tracks	Tyre tracks	Short	Yes	Yes	No	0	No	NA	NA	14	0	14	7	3	1	2	1	0	0	0	0	0	0	0	0
2024-07-16	Beginning	Burkina-Faso	Soumousso	09h45 12h26	9	25.1	6.88	43.3	2.9	165.7	2.65	Medium	4	Tyre tracks	Tyre tracks	Short	Yes	Yes	No	0	No	NA	NA	20	3	23	2	0	0	2	0	0	0	0	0	0	0	0	0
2024-07-16	Beginning	Burkina-Faso	Soumousso	09h45 12h26	10	25.8	7.45	>1100	9.1	0.311	4.2	Medium	4	Tyre tracks	Tyre tracks	Short	No	No	No	0	8	NA	NA	0	0	0	0	0	0	0	0	0	0	0	0	0	0	0	0
2024-07-16	Beginning	Burkina-Faso	Soumousso	09h45 12h26	11	25.8	7.63	764	8.7	0.311	0.75	Small	2	Tyre tracks	Tyre tracks	Short	No	No	No	0	0	NA	NA	1	14	15	4	2	7	0	0	0	0	0	0	0	0	0	0
2024-07-16	Beginning	Burkina-Faso	Soumousso	09h45 12h26	12	25.1	7.56	60.4	10.2	>356	0.5	Large	6	Pond	Ponds	Intermediate	No	No	No	0	0	NA	NA	0	0	0	0	0	0	0	0	0	0	0	0	0	0	0	0
2024-07-16	Beginning	Burkina-Faso	Soumousso	09h45 12h26	13	25.3	7.4	99.7	10.5	148	0.89	Small	2	Tyre	Artificial habitats	Short	No	No	No	0	28	NA	NA	0	0	0	0	0	0	0	0	0	0	0	0	0	0	0	0
2024-07-16	Beginning	Burkina-Faso	Soumousso	09h45 12h26	14	25.5	7.37	61.3	10.8	0.358	0.89	Small	2	Tyre	Artificial habitats	Short	No	No	No	0	0	NA	NA	0	0	0	0	0	0	0	0	0	0	0	0	0	0	0	0
2024-07-16	Beginning	Burkina-Faso	Soumousso	09h45 12h26	15	25.5	7.37	810	6.1	0.414	1.8	Medium	4	Puddles	Puddles	Short	No	No	No	0	0	NA	NA	31	33	64	9	6	5	0	0	0	0	0	0	0	0	0	0
2024-07-16	Beginning	Burkina-Faso	Soumousso	09h45 12h26	16	25.4	7.28	421	4.8	0.364	3.4	Medium	4	Tyre tracks	Tyre tracks	Short	No	No	No	0	1	NA	NA	73	8	81	10	6	3	1	0	0	0	0	0	0	0	0	0
2024-07-16	Beginning	Burkina-Faso	Soumousso	09h45 12h26	17	25.4	7.45	191	6.9	0.347	3.1	Medium	4	Streams	Streams	Intermediate	No	No	No	0	0	NA	NA	2	10	12	4	8	0	0	0	0	0	0	0	0	0	0	0
2024-07-16	Beginning	Burkina-Faso	Soumousso	09h45 12h26	18	25.5	7.33	870	7.4	0.418	2.96	Large	6	Streams	Ponds	Intermediate	No	No	No	0	0	NA	NA	70	0	70	3	17	0	0	0	0	0	0	0	0	0	0	0
2024-07-16	Beginning	Burkina-Faso	Soumousso	09h45 12h26	1	23.8	7.37	394	10	0.638	3.3	Large	6	Streams	Ponds	Intermediate	Yes	No	No	0	No	NA	NA	0	6	6	0	4	1	0	0	0	0	0	0	0	0	0	0
2024-07-16	Beginning	Burkina-Faso	Soumousso	09h45 12h26	2	24.2	7.34	206	9.3	94.5	12.9	Large	6	Streams	Ponds	Intermediate	Yes	No	Yes	33	No	NA	NA	76	394	470	4	7	9	0	0	0	0	30	1	2	0	0	0
2024-07-16	Beginning	Burkina-Faso	Soumousso	09h45 12h26	3	24.4	7.63	68.9	10.8	0.366	1.7	Medium	4	Pond	Ponds	Intermediate	No	Yes	Yes	10	No	NA	NA	15	25	40	8	7	5	0	0	0	0	8	0	0	0	0	0
2024-07-16	Beginning	Burkina-Faso	Soumousso	09h45 12h26	4	24.2	7.2	775	8.8	0.366	4.6	Large	6	Pond	Ponds	Intermediate	Yes	No	Yes	1	Yes	NA	NA	70	0	70	6	5	9	0	1	0	0	1	0	0	0	0	0
2024-07-16	Beginning	Burkina-Faso	Soumousso	09h45 12h26	5	24.7	7.25	0	0	0	5.3	Large	6	Pond	Ponds	Intermediate	Yes	No	Yes	1	Yes	NA	NA	15	104	119	3	13	2	0	2	0	0	0	0	0	0	0	0
2024-07-17	Beginning	Burkina-Faso	Bama	08h30 12h45	1	33.3	7.03	96	14.1	714	2.7	Medium	4	Streams	Streams	Short	No	No	No	0	3	NA	NA	1	4	5	3	0	0	0	0	0	0	0	0	0	0	0	0
2024-07-17	Beginning	Burkina-Faso	Bama	08h30 12h45	2	30.8	7.32	775	15.7	66.9	1.8	Medium	4	Streams	Streams	Short	No	No	No	0	0	NA	NA	3	1	6	4	0	0	0	0	0	2	0	0	0	0	0	0
2024-07-17	Beginning	Burkina-Faso	Bama	08h30 12h45	3	33.8	7.78	530	17.1	44	2.4	Medium	4	Streams	Streams	Short	No	No	Yes	1	1	NA	NA	0	7	8	8	0	0	0	0	0	0	0	0	0	0	0	0
2024-07-17	Beginning	Burkina-Faso	Bama	08h30 12h45	4	23.8	8.06	521	18	42.2	1.4	Medium	4	Streams	Streams	Short	No	No	No	0	1	NA	NA	1	2	17	0	0	0	0	0	0	14	0	0	0	0	0	0
2024-07-17	Beginning	Burkina-Faso	Bama	08h30 12h45	5	36.1	7.38	893	15.4	43.8	0.9	Small	2	Puddles	Puddles	Short	No	No	No	0	0	NA	NA	9	4	26	9	0	0	0	0	0	13	0	0	0	0	0	0
2024-07-17	Beginning	Burkina-Faso	Bama	08h30 12h45	6	35.8	7.9	414	16.9	36.3	1.4	Medium	4	Streams	Streams	Short	No	No	No	0	0	NA	NA	6	1	34	7	0	0	0	0	0	27	0	0	0	0	0	0
2024-07-17	Beginning	Burkina-Faso	Bama	08h30 12h45	7	34.3	7.78	575	18.6	146.6	5.3	Large	6	Puddles	Puddles	Short	No	No	No	0	9	NA	NA	5	4	26	6	0	0	0	0	0	17	0	0	0	0	0	0
2024-07-17	Beginning	Burkina-Faso	Bama	08h30 12h45	8	36.7	7.74	908	13.02	185.7	2.1	Medium	4	Puddles	Puddles	Short	No	No	Yes	0	2	NA	NA	0	3	3	3	0	0	0	0	0	0	0	0	0	0	0	0
2024-07-17	Beginning	Burkina-Faso	Bama	08h30 12h45	9	39.1	8.2	361	17.7	0.497	5.7	Large	6	Puddles	Puddles	Short	No	No	Yes	1	0	NA	NA	52	0	73	20	0	0	0	0	0	21	0	0	0	0	0	0
2024-07-17	Beginning	Burkina-Faso	Bama	08h30 12h45	10	33.4	7.01	1015	14.1	113	1	Medium	4	Pond	Ponds	Intermediate	Yes	No	Yes	1	3	NA	NA	2	5	49	7	0	0	0	0	0	42	0	0	0	0	0	0
2024-07-17	Beginning	Burkina-Faso	Bama	08h30 12h45	11	36.7	7.65	147	3.7	1.195	1.2	Medium	4	Tyre tracks	Tyre tracks	Short	No	No	No	0	0	NA	NA	3	1	4	2	0	0	0	0	0	0	0	0	0	0	0	0
2024-07-17	Beginning	Burkina-Faso	Bama	08h30 12h45	12	37.5	7.25	253	2.1	1.003	1	Medium	4	Tyre tracks	Tyre tracks	Short	No	No	Yes	0	0	NA	NA	24	1	229	17	0	0	0	3	204	0	0	0	0	0	0	0
2024-07-17	Beginning	Burkina-Faso	Bama	08h30 12h45	13	37.3	7.34	1011	4.2	0.573	1.8	Medium	4	Puddles	Puddles	Short	Yes	No	Yes	0	12	NA	NA	5	5	10	7	0	0	0	3	0	0	0	0	0	0	0	0
2024-07-17	Beginning	Burkina-Faso	Bama	08h30 12h45	14	38.3	7.43	990	9.5	0.423	6	Large	6	Streams	Streams	Short	No	No	Yes	0	4	NA	NA	79	1	117	19	1	0	0	0	0	37	0	0	0	0	0	0
2024-07-17	Beginning	Burkina-Faso	Bama	08h30 12h45	15	37.2	7.12	478	7.2	0.0298	3.3	Medium	4	Puddles	Puddles	Short	Yes	No	Yes	0	1	NA	NA	7	3	72	8	0	0	0	2	0	62	0	0	0	0	0	0
2024-07-21	Beginning	Burkina-Faso	Pala	08h30 12h46	1	28	6.82	214	13.6	92.3	2	Medium	4	Puddles	Puddles	Short	Yes	No	No	0	3	NA	NA	3	4	49	0	1	0	0	0	4	38	0	0	0	0	0	0
2024-07-21	Beginning	Burkina-Faso	Pala	08h30 12h47	2	28	7.2	421	19.3	0.207	21.7	Medium	4	Puddles	Puddles	Short	Yes	No	Yes	18	17	NA	NA	0	1	21	0	0	0	0	0	0	20	0	0	0	0	0	0
2024-07-21	Beginning	Burkina-Faso	Pala	08h30 12h48	3	30.1	7.24	13.2	11.1	172.8	1.1	Medium	4	Puddles	Puddles	Short	Yes	No	Yes	1	17	NA	NA	15	22	85	3	6	0	0	0	0	48	0	0	0	0	0	0
2024-07-21	Beginning	Burkina-Faso	Pala	08h30 12h49	4	28.7	7.09	56.7	7.9	184.2	1.4	Medium	4	Puddles	Puddles	Short	Yes	No	Yes	2	14	NA	NA	5	3	22	0	0	0	0	0	0	14	0	0	0	0	0	0
2024-07-21	Beginning	Burkina-Faso	Pala	08h30 12h50	5	31.3	7.18	54.7	16.7	158.2	4.3	Medium	4	Puddles	Puddles	Short	Yes	No	Yes	0	0	NA	NA	0	1	1	0	1	0	0	0	0	0	0	0	0	0	0	0
2024-07-21	Beginning	Burkina-Faso	Pala	08h30 12h51	6	27	7.46	241	4.1	0.355	0.73	Small	2	Puddles	Puddles	Short	No	No	No	0	16	NA	NA	0	1	23	0	1	0	0	0	0	22	0	0	0	0	0	0
2024-07-21	Beginning	Burkina-Faso	Pala	08h30 12h52	7	31.9	7.67	124	13.3	125.5	1.45	Medium	4	Puddles	Puddles	Short	No	No	No	0	0	NA	NA	0	0	34	0	0	0	0	0	11	23	0	0	0	0	0	0
2024-07-21	Beginning	Burkina-Faso	Pala	08h30 12h53	8	34.5	7.37	242	4.8	1.433	2.4	Medium	4	Puddles	Puddles	Short	No	No	No	0	2	NA	NA	1	0	11	0	0	0	0	0	0	10	0	0	0	0	0	0
2024-07-21	Beginning	Burkina-Faso	Pala	08h30 12h54	9	34.1	8.72	59.9	24.8	0.345	1.6	Medium	4	Puddles	Puddles	Short	No	No	No	0	79	NA	NA	2	0	2	1	8	0	0	0	0	0	0	0	0	0	0	0
2024-07-21	Beginning	Burkina-Faso	Pala	08h30 12h55	10	34.5	8.17	253	14	0.439	0.6	Small	2	Puddles	Puddles	Short	No	No	No	0	5	NA	NA	2	5	8	2	0	0	0	0	0	1	0	0	0	0	0	0
2024-07-21	Beginning	Burkina-Faso	Pala	08h30 12h56	11	33.6	7.82	51.6	10.9	0.444	0.8	Small	2	Puddles	Puddles	Short	No	No	Yes	1	2	NA	NA	0	0	3	0	0	0	0	0	0	3	0	0	0	0	0	0
2024-07-21	Beginning	Burkina-Faso	Pala	08h30 12h57	12	34.3	8.35	64.2	17.9	0.347	1.9	Medium	4	Puddles	Puddles	Short	No	No	No	0	8	NA	NA	5	4	12	0	1	1	0	0	0	3	0	0	0	0	0	0
2024-07-21	Beginning	Burkina-Faso	Pala	08h30 12h58	13	33.9	8.9	69.9	21.2	0.279	0.9	Small	2	Puddles	Puddles	Short	No	No	No	0	7	NA	NA	1	2	6	0	0	0	0	0	0	3	0	0	0	0	0	0
2024-07-21	Beginning	Burkina-Faso	Pala	08h30 12h59	14	35.8	9.19	54.4	23.1	0.444	1.75	Medium	4	Puddles	Puddles	Short	No	No	No	0	3	NA	NA	1	4	40	0	0	0	0	0	0	35	0	0	0	0	0	0
2024-07-21	Beginning	Burkina-Faso	Pala	08h30 12h60	15	35.2	8.21	16.6	33.3	0.462	0.5	Small	2	Puddles	Puddles	Short	No	No	Yes	0	3	NA	NA	1	8	25	1	3	3	0	0	0	16	0	0	0	0	0	0
2024-08-30	Middle	Burkina-Faso	Bama	07h30	1	28.7	7.6	135	15.9	61.9	3.66	Medium	4	Puddles	Puddles	Short	No	No	No	0	No	0	6	12	2	14	0	0	0	0	0	0	0	0	0	0	0	0	0
2024-08-30	Middle	Burkina-Faso	Bama	07h30	2	29.9	7.41	252	32.8	53.9	4.3	Medium	4	Puddles	Puddles	Short	No	No	Yes	0	No	0	40	0	0	0	11	1	0	0	0	0	0	2	0	0	0	0	0
2024-08-30	Middle	Burkina-Faso	Bama	07h30	3	30.2	7.48	512	23.1	51.5	2.68	Medium	4	Puddles	Puddles	Short	No	No	No	0	No	16	383	40	6	46	1	0	0	0	0	0	0	6	0	0	2	0	0
2024-08-30	Middle	Burkina-Faso	Bama	07h30	4	30.7	7.5	285	16.8	42.4	0.88	Small	2	Puddles	Puddles	Short	No	No	Yes	0	No	0	10	0	0	0	9	1	0	0	0	0	3	0	0	0	0	1	0
2024-08-30	Middle	Burkina-Faso	Bama	07h30	5	29.3	7.53	68.6	24.6	38.7	7.26	Large	6	Puddles	Puddles	Intermediate	No	No	Yes	0	No	0	258	17	4	21	11	0	0	0	0	1	16	5	0	0	0	0	0
2024-08-30	Middle	Burkina-Faso	Bama	07h30	6	30.5	7.26	49.9	20.1	35.2	3.25	Medium	4	Puddles	Puddles	Short	No	No	No	0	No	1	20	12	2	16	6	0	0	0	0	0	9	1	0	0	0	0	0
2024-08-30	Middle	Burkina-Faso	Bama	07h30	7	27.7	7.37	281	20.06	92.5	0.4	Small	2	Tyre	Artificial habitats	Intermediate	No	No	No	0	No	0	5	0	0	0	0	0	0	0	0	2	16	0	0	0	0	0	0
2024-08-30	Middle	Burkina-Faso	Bama	07h30	8	28.5	7.37	118	9.8	0.764	0.2	Small	2	Tyre	Artificial habitats	Short	No	No	No	0	No	0	0	10	0	10	0	0	0	0	0	216	443	0	0	0	0	0	0
2024-08-30	Middle	Burkina-Faso	Bama	07h30	9	30.9	8	26.2	16.8	58.8	4.1	Medium	4	Rice paddy field	Rice paddy field	Intermediate	Yes	Yes	No	0	Yes	0	0	15	5	20	10	0	0	0	0	0	19	0	0	0	0	0	0
2024-08-30	Middle	Burkina-Faso	Bama	07h30	10	31.7	8.55	120	24.2	81.3	1.45	Medium	4	Puddles	Puddles	Short	No	Yes	Yes	0	No	42	108	3	4	7	2	0	0	0	0	47	32	0	0	0	0	0	0
2024-08-30	Middle	Burkina-Faso	Bama	07h30	11	28	8.94	18.4	23.5	0.2203	2.72	Medium	4	Puddles	Puddles	Short	Yes	Yes	Yes	0	No	0	0	10	1	11	0	0	0	0	0	0	2	0	0	0	0	0	0
2024-08-30	Middle	Burkina-Faso	Bama	07h30	12	36.7	8.11	848	12.13	0.58	3.17	Medium	4	Puddles	Puddles	Short	No	No	Yes	25	No	0	1	35	67	102	20	0	0	0	0	0	31	5	0	0	15	0	0
2024-08-30	Middle	Burkina-Faso	Bama	07h30	13	36.3	8.47	16.9	25.5	0.762	6	Large	6	Puddles	Puddles	Short	Yes	Yes	Yes	0	1	0	0	16	3	19	17	0	0	0	0	0	0	7	0	0	3	0	0
2024-08-30	Middle	Burkina-Faso	Bama	07h30	14	29.6	8.43	787	13.1	0.491	0.2	Small	2	Canary	Artificial habitats	Short	No	Yes	No	0	No	0	0	5	0	5	0	0	0	0	0	0	198	0	0	0	0	0	0
2024-08-30	Middle	Burkina-Faso	Bama	07h30	15	37	8.33	120	24.3	433	4.55	Medium	4	Puddles	Puddles	Short	Yes	Yes	Yes	4	1	0	4	5	17	26	21	1	0	0	0	0	59	1	2	0	1	0	0
2024-08-31	Middle	Burkina-Faso	Pala	08h00	1	25	8.09	743	4.3	0.363	4.59	Medium	4	Puddles	Puddles	Short	No	No	No	0	No	0	0	24	6	30	0	0	0	0	0	0	0	0	0	0	0	0	0
2024-08-31	Middle	Burkina-Faso	Pala	08h00	2	25.2	7.6	373	6.5	198.4	3.8	Medium	4	Puddles	Puddles	Short	No	Yes	Yes	2	Yes	0	0	1	12	13	0	0	0	0	0	0	0	0	0	0	0	0	0
2024-08-31	Middle	Burkina-Faso	Pala	08h00	3	25	7.67	119	20.1	42.6	4.3	Medium	4	Puddles	Puddles	Short	No	No	No	0	No	2	3	1	4	5	0	0	0	0	0	0	1	0	0	0	0	0	0
2024-08-31	Middle	Burkina-Faso	Pala	08h00	4	26.1	9.61	18.7	17.3	120.7	2	Medium	4	Pond	Ponds	Intermediate	No	Yes	No	0	No	18	19	8	8	16	0	0	0	0	0	1	5	0	0	0	0	0	0
2024-08-31	Middle	Burkina-Faso	Pala	08h00	5	26.2	9.79	20	21.7	148.6	14.5	Large	6	Pond	Ponds	Intermediate	No	Yes	No	0	No	20	0	0	0	0	0	0	0	0	0	0	4	0	0	0	0	0	0
2024-08-31	Middle	Burkina-Faso	Pala	08h00	6	25.8	8.65	15.3	56.4	146.9	0.55	Small	2	Tyre	Artificial habitats	Short	Yes	No	Yes	0	Yes	0	0	0	0	0	0	0	0	0	0	11	0	0	0	0	0	0	0
2024-08-31	Middle	Burkina-Faso	Pala	08h00	7	25.8	8.74	5.14	16.3	0.326	1.3	Medium	4	Canary	Artificial habitats	Intermediate	No	No	Yes	0	Yes	0	0	0	4	4	0	0	0	0	0	0	0	0	0	0	0	0	0
2024-08-31	Middle	Burkina-Faso	Pala	08h00	8	26.4	8.2	41.4	20.2	129.1	0.95	Small	2	Puddles	Puddles	Short	No	No	No	0	No	0	0	1	2	3	0	0	0	0	0	1	0	0	0	0	0	0	0
2024-08-31	Middle	Burkina-Faso	Pala	08h00	9	26.9	8.26	15	20.7	60.8	2.4	Medium	4	Puddles	Puddles	Short	No	Yes	No	0	1	13	0	1	1	2	0	0	0	0	0	5	0	0	0	0	0	0	0
2024-08-31	Middle	Burkina-Faso	Pala	08h00	10	26.3	9.1	7.97	18.9	147.3	1.3	Medium	4	Pond	Ponds	Intermediate	No	No	No	0	No	6	1	0	1	1	0	0	0	0	0	0	0	0	0	0	0	0	0
2024-09-09	Middle	Burkina-Faso	Pala	08h00	11	26.1	7.8	294	15.3	0.366	0.4	Small	2	Puddles	Puddles	Short	No	No	No	0	No	20	10	32	6	38	0	0	0	0	0	0	0	0	0	0	0	0	0
2024-09-09	Middle	Burkina-Faso	Pala	08h00	12	26.5	7.89	2.22	20	0.517	1.6	Medium	4	Puddles	Puddles	Short	No	No	No	0	Yes	200	15	17	3	20	0	0	0	0	0	0	0	0	0	0	0	0	0
2024-09-09	Middle	Burkina-Faso	Pala	08h00	13	26.3	7.69	3.74	29.3	1.161	0.65	Small	2	Puddles	Puddles	Short	No	No	No	0	No	10	15	3	3	6	0	0	0	0	0	0	0	0	0	0	0	0	0
2024-09-09	Middle	Burkina-Faso	Pala	08h00	14	27.2	6.68	3	8.9	0.4	1.1	Medium	4	Puddles	Puddles	Short	No	Yes	No	0	No	100	50	23	0	23	0	0	0	0	0	0	0	0	0	0	0	0	0
2024-09-09	Middle	Burkina-Faso	Pala	08h00	15	26.9	8.14		15.7	0.382	1	Medium	4	Tyre tracks	Tyre tracks	Short	No	No	No	0	1	79	32	24	81	105	0	0	0	0	0	0	0	0	0	0	0	0	0
2024-09-01	Middle	Burkina-Faso	Soumousso	7h30 11h38	1	24.8	7.09	163	9.8	140.1	15	Large	6	Puddles	Puddles	Short	No	Yes	Yes	6	No	17	2	2	10	31	5	5	1	0	0	0	64	0	0	0	6	0	0
2024-09-01	Middle	Burkina-Faso	Soumousso	7h30 11h38	2	26.6	7.56	112	14.2	0.232	1.1	Medium	4	Puddles	Puddles	Short	No	Yes	No	0	No	30	0	11	1	42	0	5	0	0	1	0	15	0	0	0	0	0	0
2024-09-01	Middle	Burkina-Faso	Soumousso	7h30 11h38	3	27	8.1	716	14.5	0.431	3.4	Medium	4	Puddles	Puddles	Short	Yes	Yes	No	0	No	2	7	1	6	16	1	7	1	0	0	0	0	0	0	0	0	0	0
2024-09-01	Middle	Burkina-Faso	Soumousso	7h30 11h38	4	27	8.09	1100	6.2	0.237	5	Medium	4	Puddles	Puddles	Short	No	No	Yes	3	No	1	3	3	3	10	0	3	0	0	0	0	0	0	0	0	3	0	0
2024-09-01	Middle	Burkina-Faso	Soumousso	7h30 11h38	5	24.4	7.71	44.2	5	0.241	0.5	Small	2	Tyre	Artificial habitats	Short	No	No	No	0	Yes	5	0	0	0	5	0	0	0	0	1	0	15	0	0	0	0	0	0
2024-09-01	Middle	Burkina-Faso	Soumousso	7h30 11h38	6	26.6	8.06	272	19.7	78	3.7	Medium	4	Puddles	Puddles	Short	Yes	Yes	No	0	No	7	0	0	14	7	2	8	2	0	0	0	2	2	1	0	2	0	0
2024-09-01	Middle	Burkina-Faso	Soumousso	7h30 11h38	7	26.6	7.8	660	17.4	59.6	12.6	Large	6	Puddles	Puddles	Short	Yes	Yes	Yes	6	No	10	2	0	13	25	1	4	8	0	0	0	2	0	0	0	5	0	0
2024-09-01	Middle	Burkina-Faso	Soumousso	7h30 11h38	8	26.7	7.57	568	10	77.9	14.6	Large	6	Puddles	Puddles	Short	No	Yes	No	0	No	10	5	2	2	19	0	1	2	0	0	0	10	0	0	0	8	0	0
2024-09-01	Middle	Burkina-Faso	Soumousso	7h30 11h38	9	26.1	7.4	344	10.7	0.203	8	Large	6	Puddles	Puddles	Short	Yes	Yes	Yes	11	No	18	5	10	54	87	2	7	11	0	0	0	10	2	0	0	9	0	0
2024-09-01	Middle	Burkina-Faso	Soumousso	7h30 11h38	10	29.5	8.3	575	18	63.4	22.2	Large	6	Puddles	Puddles	Short	No	Yes	Yes	1	No	0	0	20	32	52	6	9	5	0	0	0	3	0	0	0	0	1	0
2024-09-01	Middle	Burkina-Faso	Soumousso	7h30 11h38	11	27.6	7.91	12.6	12.4	82.7	0.5	Small	2	Tyre	Artificial habitats	Short	No	Yes	No	0	No	4	5	0	0	9	0	0	0	0	0	31	0	0	0	0	0	1	0
2024-09-01	Middle	Burkina-Faso	Soumousso	7h30 11h38	12	29	7.61	10.6	0.222	199	4.4	Medium	4	Puddles	Puddles	Intermediate	Yes	No	Yes	1	No	10	20	23	21	74	1	3	16	0	0	0	10	1	0	0	0	0	0
2024-09-01	Middle	Burkina-Faso	Soumousso	7h30 11h38	13	32.2	8.03	61.1	20.6	135	9.9	Large	6	Puddles	Puddles	Intermediate	Yes	Yes	Yes	2	No	10	5	4	7	26	0	0	6	0	0	0	0	0	0	0	0	2	0
2024-09-01	Middle	Burkina-Faso	Soumousso	7h30 11h38	14	28.9	7.64	169	9.4	105.1	11.7	Large	6	Puddles	Puddles	Intermediate	Yes	Yes	Yes	13	Yes	0	0	0	20	20	1	15	2	0	0	0	9	9	0	0	4	0	0
2024-09-01	Middle	Burkina-Faso	Soumousso	7h30 11h38	15	29.1	7.44	25.5	13.2	139.4	8	Large	6	Puddles	Puddles	Intermediate	Yes	Yes	No	0	Yes	0	0	8	72	80	1	17	2	0	0	0	0	0	0	0	0	0	0
2024-10-17	End	Burkina-Faso	Pala	08h05	1	36.5	7.6	179	14	18.5	9.5	Large	6	Puddles	Puddles	Intermediate	No	No	No	0	No	6	51	9	3	17	0	0	0	0	18	0	0	0	0	0	0	0	0
2024-10-17	End	Burkina-Faso	Pala	08h05	2	32.1	7.4	156	18	38	6.3	Large	6	Tyre tracks	Tyre tracks	Intermediate	Yes	No	No	0	No	11	31	5	1	6	0	0	0	0	1	0	0	0	0	0	0	0	0
2024-10-17	End	Burkina-Faso	Pala	08h05	3	35.3	6.4	223	2	25	0.9	Small	2	Streams	Streams	Intermediate	Yes	Yes	Yes	0	No	8	41	10	0	20	0	0	0	0	8	0	0	0	0	0	0	0	0
2024-10-17	End	Burkina-Faso	Pala	08h05	4	28.4	11	16	4	2	1.25	Medium	4	Pond	Ponds	Intermediate	No	No	No	0	No	10	4	6	5	16	1	3	5	0	1	0	0	0	0	0	0	0	0
2024-10-17	End	Burkina-Faso	Pala	08h05	5	28.1	9.5	65.8	155	131.5	1.6	Medium	4	Pond	Ponds	Intermediate	No	Yes	Yes	0	1O	0	8	24	30	82	0	5	18	0	1	0	0	0	0	0	0	0	0
2024-10-17	End	Burkina-Faso	Pala	08h05	6	34.2	8.4	56.2	18	98.5	3	Medium	4	Rice paddy field	River/pocket	Permanent	No	Yes	No	0	No	81	12	17	23	109	0	5	11	1	3	0	3	0	0	0	0	0	0
2024-10-17	End	Burkina-Faso	Pala	08h05	7	35.1	8.8	20.1	19.5	133.5	2.5	Medium	4	Rice paddy field	River/pocket	Permanent	No	Yes	No	0	No	123	161	20	1	44	0	2	17	0	1	0	0	0	0	0	0	0	0
2024-10-17	End	Burkina-Faso	Pala	08h05	8	28.9	8.45	41.6	15.5	104	0.5	Small	2	Rice paddy field	River/pocket	Permanent	No	No	No	0	3	17	24	4	7	24	0	7	7	0	6	0	0	0	0	0	0	0	0
2024-10-17	End	Burkina-Faso	Pala	08h05	9	30.5	7.7	39.5	10.5	95.5	1.3	Medium	4	Rice paddy field	River/pocket	Permanent	No	No	No	0	1	31	62	10	6	64	0	0	0	0	0	0	0	0	0	0	0	0	0
2024-10-17	End	Burkina-Faso	Pala	08h05	10	27.5	7.35	14.3	9.5	41	0.3	Small	2	Canary	Artificial habitats	Short	No	No	Yes	0	12	0	0	0	0	0	1	1	2	0	1	5	0	0	0	0	0	0	0
2024-10-17	End	Burkina-Faso	Pala	08h05	11	35	7.9	43.4	21.5	808	3.3	Medium	4	Rice paddy field	River/pocket	Permanent	No	Yes	No	0	17	102	151	20	30	90	0	4	14	1	0	0	0	0	0	0	0	0	0
2024-10-17	End	Burkina-Faso	Pala	08h05	12	34.7	7.85	37.7	19.5	415	1.7	Medium	4	Rice paddy field	River/pocket	Permanent	15	Yes	No	0	15	116	201	20	45	144	1	2	17	0	0	0	0	0	0	0	0	0	0
2024-10-17	End	Burkina-Faso	Pala	08h05	13	33.7	7.90	29.5	14.5	477	2	Medium	4	Rice paddy field	River/pocket	Permanent	No	Yes	No	0	8	31	72	20	20	88	0	6	9	0	5	0	0	0	0	0	0	0	0
2024-10-17	End	Burkina-Faso	Pala	08h05	14	39.5	9.25	12.7	17.5	184	1.6	Medium	4	Rice paddy field	River/pocket	Permanent	No	No	Yes	0	1	21	63	14	10	71	1	7	12	0	2	0	0	0	0	0	0	0	0
2024-10-17	End	Burkina-Faso	Pala	08h05	15	32.8	7.82	9.06	13	125	2.6	Medium	4	Rice paddy field	River/pocket	Permanent	No	No	No	0	4	80	116	10	7	98	1	8	4	0	3	0	0	0	0	0	0	0	0
2024-10-18	End	Burkina-Faso	Bama	09h45	1	28.6	6.75	846	15	65	1.1	Medium	4	Puddles	Puddles	Short	No	No	Yes	0	7	11	25	30	20	66	19	1	0	0	0	0	0	0	0	0	0	0	0
2024-10-18	End	Burkina-Faso	Bama	09h45	2	28.2	7.2	720	12.5	61	0.61	Small	2	Puddles	Puddles	Short	No	No	No	0	No	7	10	4	11	17	19	1	0	0	0	0	0	0	0	0	0	0	0
2024-10-18	End	Burkina-Faso	Bama	09h45	3	29.5	6.85	284	10.5	43.5	1.90	Medium	4	Tyre tracks	Tyre tracks	Short	No	No	Yes	0	No	15	21	4	3	18	17	1	0	0	1	0	0	0	0	0	0	0	0
2024-10-18	End	Burkina-Faso	Bama	09h45	4	30	7.1	164	9.5	30.5	2.7	Medium	4	Tyre tracks	Tyre tracks	Short	No	No	Yes	0	No	44	61	20	15	42	16	0	0	0	3	0	0	0	0	0	0	0	0
2024-10-18	End	Burkina-Faso	Bama	09h45	5	29.9	7.5	113	15.5	107.5	5.3	Large	6	Tyre tracks	Tyre tracks	Intermediate	No	No	Yes	2	1	104	122	10	4	22	10	3	5	0	1	0	10	1	1	0	1	0	0
2024-10-18	End	Burkina-Faso	Bama	09h45	6	30.9	7.65	90	15	65.1	4.8	Medium	4	Streams	Streams	Intermediate	No	No	Yes	0	No	180	206	22	11	91	7	6	6	1	0	0	0	0	0	0	0	0	0
2024-10-18	End	Burkina-Faso	Bama	09h45	7	31	7.25	108.1	13.5	92	2.8	Medium	4	Puddles	Puddles	Short	No	No	Yes	2	No	121	111	10	10	50	7	3	1	8	1	0	0	2	0	0	0	0	0
2024-10-18	End	Burkina-Faso	Bama	09h45	8	29.7	7.5	195	11	48.5	12.2	Large	6	Rice paddy field	Rice paddy field	Intermediate	Yes	Yes	Yes	0	No	8	13	10	2	26	4	2	6	1	0	0	22	0	0	0	0	0	0
2024-10-18	End	Burkina-Faso	Bama	09h45	9	32.6	7.25	332	14	78	8.4	Large	6	Rice paddy field	Rice paddy field	Intermediate	Yes	Yes	Yes	0	6	112	224	30	20	54	9	4	7	0	0	0	17	0	0	0	6	0	0
2024-10-18	End	Burkina-Faso	Bama	09h45	10	34.2	8.85	293	20.1	1.196	1.4	Medium	4	Tyre tracks	Tyre tracks	Short	No	Yes	Yes	6	6	102	310	6	7	19	10	2	3	1	0	0	102	0	0	0	0	0	0
2024-10-18	End	Burkina-Faso	Bama	09h45	11	34.9	7.7	544	2	1.310	1.20	Medium	4	Puddles	Puddles	Short	No	Yes	Yes	0	No	1	15	38	60	104	19	0	0	1	0	0	0	0	0	0	0	0	0
2024-10-18	End	Burkina-Faso	Bama	09h45	12	27.5	7.5	46.4	4	1.195	12.1	Large	6	Streams	Streams	Intermediate	No	No	Yes	0	No	11	10	10	0	20	15	2	0	3	0	0	0	0	0	0	0	0	0
2024-10-18	End	Burkina-Faso	Bama	09h45	13	30.1	8.90	116	16.5	1.100	7.30	Large	6	Streams	Streams	Intermediate	No	Yes	Yes	0	No	101	341	2	0	103	18	2	0	0	0	0	0	0	0	0	0	0	0
2024-10-18	End	Burkina-Faso	Bama	09h45	14	34.7	7.80	45.6	10.5	251	0.40	Small	2	Puddles	Puddles	Short	No	Yes	Yes	0	No	12	10	6	42	56	17	1	0	0	0	0	0	0	0	0	0	0	0
2024-10-18	End	Burkina-Faso	Bama	09h45	15	33.1	7.25	512	35	274	0.45	Small	2	Bucket	Artificial habitats	Short	No	No	Yes	0	No	0	0	0	7	7	6	0	0	1	1	13	0	0	0	0	0	0	0
2024-10-18	End	Burkina-Faso	Soumousso	09h00	1	31.3	7.1	18.3	11.5	478	1.20	Medium	4	Puddles	Puddles	Short	No	Yes	No	0	No	0	11	5	5	18	3	2	6	1	0	0	28	0	0	0	0	0	0
2024-10-18	End	Burkina-Faso	Soumousso	09h00	2	32.1	7.53	704	11.5	35.5	9	Large	6	Tyre tracks	Tyre tracks	Intermediate	Yes	No	Yes	0	No	3	4	2	1	7	0	4	2	0	0	0	6	0	0	0	0	0	1
2024-10-18	End	Burkina-Faso	Soumousso	09h00	3	29.9	6.85	109	6	47.5	7	Large	6	Puddles	Puddles	Intermediate	Yes	No	Yes	0	No	10	15	20	4	37	3	8	7	0	0	0	0	0	0	0	0	0	0
2024-10-18	End	Burkina-Faso	Soumousso	09h00	4	33.2	7	50.8	13	90	9	Large	6	Tyre tracks	Tyre tracks	Intermediate	Yes	No	No	0	No	0	15	0	0	9	1	8	0	0	0	0	3	0	0	0	0	0	0
2024-10-18	End	Burkina-Faso	Soumousso	09h00	5	34.1	6.75	59.8	14.5	39	12	Large	6	Puddles	Puddles	Intermediate	Yes	No	Yes	1	No	15	21	6	11	28	1	16	6	0	0	0	8	0	0	0	0	0	0
2024-10-18	End	Burkina-Faso	Soumousso	09h00	6	29.1	6.75	16.6	3.10	130.9	4.5	Medium	4	Tyre tracks	Tyre tracks	Intermediate	Yes	No	Yes	1	No	24	61	10	4	44	0	11	9	0	0	0	0	0	0	0	1	0	0
2024-10-18	End	Burkina-Faso	Soumousso	09h00	7	34.2	6.75	276	10.5	63	11	Large	6	Puddles	Puddles	Intermediate	Yes	No	No	0	No	27	85	10	3	55	0	9	8	3	0	0	0	0	0	0	0	0	0
2024-10-18	End	Burkina-Faso	Soumousso	09h00	8	34.7	7	601	10.5	72.5	14	Large	6	Puddles	Puddles	Intermediate	Yes	No	Yes	0	No	32	54	7	4	42	1	14	4	0	1	0	2	0	0	0	0	0	0
2024-10-18	End	Burkina-Faso	Soumousso	09h00	9	35.7	7	197	15	137.10	10.6	Large	6	Puddles	Puddles	Intermediate	Yes	Yes	Yes	0	No	32	101	20	10	68	1	9	10	0	0	0	0	0	0	0	0	0	0
2024-10-18	End	Burkina-Faso	Soumousso	09h00	10	34.9	7.65	239	17.5	346	8.7	Large	6	Tyre tracks	Tyre tracks	Intermediate	No	Yes	Yes	2	No	4	15	50	80	153	1	6	12	1	0	0	37	0	2	0	0	0	0
2024-10-18	End	Burkina-Faso	Soumousso	09h00	11	34.1	7.80	174	11.5	183.10	2	Medium	4	Tyre	Artificial habitats	Short	No	No	No	0	No	0	0	0	0	0	0	0	0	0	0	53	0	0	0	0	0	0	0
2024-10-18	End	Burkina-Faso	Soumousso	09h00	12	36.3	7.40	446	10.10	112.5	2.10	Medium	4	Tyre	Artificial habitats	Short	No	No	No	0	No	0	0	0	0	0	0	0	0	0	0	1	0	0	0	0	0	0	0
2024-10-18	End	Burkina-Faso	Soumousso	09h00	13	41	8.10	203	17	192.5	9	Large	6	Puddles	Puddles	Intermediate	No	Yes	Yes	2	Yes	4	7	0	34	47	2	8	10	0	0	0	0	0	0	0	2	0	0
2024-10-18	End	Burkina-Faso	Soumousso	09h00	14	41.1	9.40	294	20.5	206	3.30	Medium	4	Puddles	Puddles	Intermediate	Yes	Yes	No	0	Yes	12	54	20	50	140	0	11	9	0	0	0	0	0	0	0	0	0	0
2024-10-18	End	Burkina-Faso	Soumousso	09h00	15	32.7	7.85	31.3	125	1845	10	Large	6	Puddles	Puddles	Intermediate	Yes	Yes	Yes	3	Yes	30	81	18	20	63	0	7	12	1	0	0	0	0	1	0	2	0	0
