# Supplementary material for: Ecological analysis of mosquito larval communities in Burkina Faso to inform environmental monitoring of genetic control programs
Source: Sci Rep. 2026 Jan 13;16:5091. doi: 10.1038/s41598-026-35602-6 (PMC12877188; doi:10.1038/s41598-026-35602-6)
Supplement: Supplementary file 5 — Supplementary Material 5 [file 41598_2026_35602_MOESM5_ESM.xlsx]

## Sheet: Feuil1
Site	Gite number	Breeding_site	Anopheles coluzzii	Anopheles gambiae s.s.	Anopheles arabiensis	Hybride (coluzzii *gambiae s.s.)	Anopheles ND	Aedes	Culex	Corixidae	Dytiscidae	Hydrophilidae	Baetidae	Nepidae	Libellulidae	Anopheles
Soumousso	6	Ponds	7	6	7	0	0	0	0	7	0	0	0	0	0	90
Soumousso	7	Tyre tracks	4	6	3	2	0	0	0	0	0	0	0	0	0	15
Soumousso	8	Tyre tracks	7	3	1	2	1	0	0	0	0	0	0	0	0	14
Soumousso	9	Tyre tracks	2	0	0	2	0	0	0	0	0	0	0	0	0	23
Soumousso	10	Tyre tracks	0	0	0	0	0	0	0	0	0	0	0	0	0	0
Soumousso	11	Tyre tracks	4	2	7	0	0	0	0	0	0	0	0	0	0	15
Soumousso	12	Ponds	0	0	0	0	0	0	0	0	0	0	0	0	0	0
Soumousso	13	Artificial habitats	0	0	0	0	0	0	0	0	0	0	0	0	0	0
Soumousso	14	Artificial habitats	0	0	0	0	0	0	0	0	0	0	0	0	0	0
Soumousso	15	Puddles	9	6	5	0	0	0	0	0	0	0	0	0	0	64
Soumousso	16	Tyre tracks	10	6	3	1	0	0	0	0	0	0	0	0	0	81
Soumousso	17	Streams	4	8	0	0	0	0	0	0	0	0	0	0	0	12
Soumousso	18	Ponds	3	17	0	0	0	0	0	0	0	0	0	0	0	70
Soumousso	1	Ponds	0	4	1	0	0	0	0	0	0	0	0	0	0	6
Soumousso	2	Ponds	4	7	9	0	0	0	0	30	1	2	0	0	0	470
Soumousso	3	Ponds	8	7	5	0	0	0	0	8	0	0	0	0	0	40
Soumousso	4	Ponds	6	5	9	0	1	0	0	1	0	0	0	0	0	70
Soumousso	5	Ponds	3	13	2	0	2	0	0	0	0	0	0	0	0	119
Bama	1	Streams	3	0	0	0	0	0	0	0	0	0	0	0	0	5
Bama	2	Streams	4	0	0	0	0	0	2	0	0	0	0	0	0	6
Bama	3	Streams	8	0	0	0	0	0	0	0	0	0	0	0	0	8
Bama	4	Streams	0	0	0	0	0	0	14	0	0	0	0	0	0	17
Bama	5	Puddles	9	0	0	0	0	0	13	0	0	0	0	0	0	26
Bama	6	Streams	7	0	0	0	0	0	27	0	0	0	0	0	0	34
Bama	7	Puddles	6	0	0	0	0	0	17	0	0	0	0	0	0	26
Bama	8	Puddles	3	0	0	0	0	0	0	0	0	0	0	0	0	3
Bama	9	Puddles	20	0	0	0	0	0	21	0	0	0	0	0	0	73
Bama	10	Ponds	7	0	0	0	0	0	42	0	0	0	0	0	0	49
Bama	11	Tyre tracks	2	0	0	0	0	0	0	0	0	0	0	0	0	4
Bama	12	Tyre tracks	17	0	0	0	3	204	0	0	0	0	0	0	0	229
Bama	13	Puddles	7	0	0	0	3	0	0	0	0	0	0	0	0	10
Bama	14	Streams	19	1	0	0	0	0	37	0	0	0	0	0	0	117
Bama	15	Puddles	8	0	0	0	2	0	62	0	0	0	0	0	0	72
Pala	1	Puddles	0	1	0	0	0	4	38	0	0	0	0	0	0	49
Pala	2	Puddles	0	0	0	0	0	0	20	0	0	0	0	0	0	21
Pala	3	Puddles	3	6	0	0	0	0	48	0	0	0	0	0	0	85
Pala	4	Puddles	0	0	0	0	0	0	14	0	0	0	0	0	0	22
Pala	5	Puddles	0	1	0	0	0	0	0	0	0	0	0	0	0	1
Pala	6	Puddles	0	1	0	0	0	0	22	0	0	0	0	0	0	23
Pala	7	Puddles	0	0	0	0	0	11	23	0	0	0	0	0	0	34
Pala	8	Puddles	0	0	0	0	0	0	10	0	0	0	0	0	0	11
Pala	9	Puddles	1	8	0	0	0	0	0	0	0	0	0	0	0	2
Pala	10	Puddles	2	0	0	0	0	0	1	0	0	0	0	0	0	8
Pala	11	Puddles	0	0	0	0	0	0	3	0	0	0	0	0	0	3
Pala	12	Puddles	0	1	1	0	0	0	3	0	0	0	0	0	0	12
Pala	13	Puddles	0	0	0	0	0	0	3	0	0	0	0	0	0	6
Pala	14	Puddles	0	0	0	0	0	0	35	0	0	0	0	0	0	40
Pala	15	Puddles	1	3	3	0	0	0	16	0	0	0	0	0	0	25
Bama	1	Puddles	0	0	0	0	0	0	0	0	0	0	0	0	0	14
Bama	2	Puddles	11	1	0	0	0	0	0	2	0	0	0	0	0	0
Bama	3	Puddles	1	0	0	0	0	0	0	6	0	0	2	0	0	46
Bama	4	Puddles	9	1	0	0	0	0	3	0	0	0	0	1	0	0
Bama	5	Puddles	11	0	0	0	0	1	16	5	0	0	0	0	0	21
Bama	6	Puddles	6	0	0	0	0	0	9	1	0	0	0	0	0	16
Bama	7	Artificial habitats	0	0	0	0	0	2	16	0	0	0	0	0	0	0
Bama	8	Artificial habitats	0	0	0	0	0	216	443	0	0	0	0	0	0	10
Bama	9	Rice paddy field	10	0	0	0	0	0	19	0	0	0	0	0	0	20
Bama	10	Puddles	2	0	0	0	0	47	32	0	0	0	0	0	0	7
Bama	11	Puddles	0	0	0	0	0	0	2	0	0	0	0	0	0	11
Bama	12	Puddles	20	0	0	0	0	0	31	5	0	0	15	0	0	102
Bama	13	Puddles	17	0	0	0	0	0	0	7	0	0	3	0	0	19
Bama	14	Artificial habitats	0	0	0	0	0	0	198	0	0	0	0	0	0	5
Bama	15	Puddles	21	1	0	0	0	0	59	1	2	0	1	0	0	26
Pala	1	Puddles	0	0	0	0	0	0	0	0	0	0	0	0	0	30
Pala	2	Puddles	0	0	0	0	0	0	0	0	0	0	0	0	0	13
Pala	3	Puddles	0	0	0	0	0	0	1	0	0	0	0	0	0	5
Pala	4	Ponds	0	0	0	0	0	1	5	0	0	0	0	0	0	16
Pala	5	Ponds	0	0	0	0	0	0	4	0	0	0	0	0	0	0
Pala	6	Artificial habitats	0	0	0	0	0	11	0	0	0	0	0	0	0	0
Pala	7	Artificial habitats	0	0	0	0	0	0	0	0	0	0	0	0	0	4
Pala	8	Puddles	0	0	0	0	0	1	0	0	0	0	0	0	0	3
Pala	9	Puddles	0	0	0	0	0	5	0	0	0	0	0	0	0	2
Pala	10	Ponds	0	0	0	0	0	0	0	0	0	0	0	0	0	1
Pala	11	Puddles	0	0	0	0	0	0	0	0	0	0	0	0	0	38
Pala	12	Puddles	0	0	0	0	0	0	0	0	0	0	0	0	0	20
Pala	13	Puddles	0	0	0	0	0	0	0	0	0	0	0	0	0	6
Pala	14	Puddles	0	0	0	0	0	0	0	0	0	0	0	0	0	23
Pala	15	Tyre tracks	0	0	0	0	0	0	0	0	0	0	0	0	0	105
Soumousso	1	Puddles	5	5	1	0	0	0	64	0	0	0	6	0	0	31
Soumousso	2	Puddles	0	5	0	0	1	0	15	0	0	0	0	0	0	42
Soumousso	3	Puddles	1	7	1	0	0	0	0	0	0	0	0	0	0	16
Soumousso	4	Puddles	0	3	0	0	0	0	0	0	0	0	3	0	0	10
Soumousso	5	Artificial habitats	0	0	0	0	1	0	15	0	0	0	0	0	0	5
Soumousso	6	Puddles	2	8	2	0	0	0	2	2	1	0	2	0	0	7
Soumousso	7	Puddles	1	4	8	0	0	0	2	0	0	0	5	0	0	25
Soumousso	8	Puddles	0	1	2	0	0	0	10	0	0	0	8	0	0	19
Soumousso	9	Puddles	2	7	11	0	0	0	10	2	0	0	9	0	0	87
Soumousso	10	Puddles	6	9	5	0	0	0	3	0	0	0	0	1	0	52
Soumousso	11	Artificial habitats	0	0	0	0	0	31	0	0	0	0	0	1	0	9
Soumousso	12	Puddles	1	3	16	0	0	0	10	1	0	0	0	0	0	74
Soumousso	13	Puddles	0	0	6	0	0	0	0	0	0	0	0	2	0	26
Soumousso	14	Puddles	1	15	2	0	0	0	9	9	0	0	4	0	0	20
Soumousso	15	Puddles	1	17	2	0	0	0	0	0	0	0	0	0	0	80
Pala	1	Puddles	0	0	0	0	18	0	0	0	0	0	0	0	0	17
Pala	2	Tyre tracks	0	0	0	0	1	0	0	0	0	0	0	0	0	6
Pala	3	Streams	0	0	0	0	8	0	0	0	0	0	0	0	0	20
Pala	4	Ponds	1	3	5	0	1	0	0	0	0	0	0	0	0	16
Pala	5	Ponds	0	5	18	0	1	0	0	0	0	0	0	0	0	82
Pala	6	Rice paddy field	0	5	11	1	3	0	3	0	0	0	0	0	0	109
Pala	7	Rice paddy field	0	2	17	0	1	0	0	0	0	0	0	0	0	44
Pala	8	Rice paddy field	0	7	7	0	6	0	0	0	0	0	0	0	0	24
Pala	9	Rice paddy field	0	0	0	0	0	0	0	0	0	0	0	0	0	64
Pala	10	Artificial habitats	1	1	2	0	1	5	0	0	0	0	0	0	0	0
Pala	11	Rice paddy field	0	4	14	1	0	0	0	0	0	0	0	0	0	90
Pala	12	Rice paddy field	1	2	17	0	0	0	0	0	0	0	0	0	0	144
Pala	13	Rice paddy field	0	6	9	0	5	0	0	0	0	0	0	0	0	88
Pala	14	Rice paddy field	1	7	12	0	2	0	0	0	0	0	0	0	0	71
Pala	15	Rice paddy field	1	8	4	0	3	0	0	0	0	0	0	0	0	98
Bama	1	Puddles	19	1	0	0	0	0	0	0	0	0	0	0	0	66
Bama	2	Puddles	19	1	0	0	0	0	0	0	0	0	0	0	0	17
Bama	3	Tyre tracks	17	1	0	0	1	0	0	0	0	0	0	0	0	18
Bama	4	Tyre tracks	16	0	0	0	3	0	0	0	0	0	0	0	0	42
Bama	5	Tyre tracks	10	3	5	0	1	0	10	1	1	0	1	0	0	22
Bama	6	Streams	7	6	6	1	0	0	0	0	0	0	0	0	0	91
Bama	7	Puddles	7	3	1	8	1	0	0	2	0	0	0	0	0	50
Bama	8	Rice paddy field	4	2	6	1	0	0	22	0	0	0	0	0	0	26
Bama	9	Rice paddy field	9	4	7	0	0	0	17	0	0	0	6	0	0	54
Bama	10	Tyre tracks	10	2	3	1	0	0	102	0	0	0	0	0	0	19
Bama	11	Puddles	19	0	0	1	0	0	0	0	0	0	0	0	0	104
Bama	12	Streams	15	2	0	3	0	0	0	0	0	0	0	0	0	20
Bama	13	Streams	18	2	0	0	0	0	0	0	0	0	0	0	0	103
Bama	14	Puddles	17	1	0	0	0	0	0	0	0	0	0	0	0	56
Bama	15	Artificial habitats	6	0	0	1	1	13	0	0	0	0	0	0	0	7
Soumousso	1	Puddles	3	2	6	1	0	0	28	0	0	0	0	0	0	18
Soumousso	2	Tyre tracks	0	4	2	0	0	0	6	0	0	0	0	0	1	7
Soumousso	3	Puddles	3	8	7	0	0	0	0	0	0	0	0	0	0	37
Soumousso	4	Tyre tracks	1	8	0	0	0	0	3	0	0	0	0	0	0	9
Soumousso	5	Puddles	1	16	6	0	0	0	8	0	0	0	0	0	0	28
Soumousso	6	Tyre tracks	0	11	9	0	0	0	0	0	0	0	1	0	0	44
Soumousso	7	Puddles	0	9	8	3	0	0	0	0	0	0	0	0	0	55
Soumousso	8	Puddles	1	14	4	0	1	0	2	0	0	0	0	0	0	42
Soumousso	9	Puddles	1	9	10	0	0	0	0	0	0	0	0	0	0	68
Soumousso	10	Tyre tracks	1	6	12	1	0	0	37	0	2	0	0	0	0	153
Soumousso	11	Artificial habitats	0	0	0	0	0	53	0	0	0	0	0	0	0	0
Soumousso	12	Artificial habitats	0	0	0	0	0	1	0	0	0	0	0	0	0	0
Soumousso	13	Puddles	2	8	10	0	0	0	0	0	0	0	2	0	0	47
Soumousso	14	Puddles	0	11	9	0	0	0	0	0	0	0	0	0	0	140
Soumousso	15	Puddles	0	7	12	1	0	0	0	0	1	0	2	0	0	63
																0
																0
																0
																0
																0
																0
																0
																0
																0
																0
																0
																0
																0
																0
																0
																0
																0
																0
																0
																0
																0
																0
																0
																0
																0
																0
																0
																0
																0
																0
																0
																0
																0
																0
																0
																0
																0
																0
																0
																0
																0
																0
																0
																0
																0
																0
																0
																0
																0
																0
																0
																0
																0
																0
																0
																0
																0
																0
																0
																0
																0
																0
																0
																0
																0
																0
																0
																0
																0
																0
																0
																0
																0
																0
																0
																0
																0
																0
																0
																0
																0
																0
																0
																0
																0
																0
																0
																0
																0
																0
																0
																0
																0
																0
																0
																0
																0
																0
																0
																0
																0
																0
																0
																0
																0
																0
																0
																0
																0
																0
																0
																0
																0
																0
																0
																0
																0
																0
																0
																0
																0
																0
																0
																0
																0
																0
																0
																0
																0
																0
																0
																0
																0
																0
																0
																0
																0
																0
																0
																0
																0
																0
																0
																0
																0
																0
																0
																0
																0
																0
																0
																0
																0
																0
																0
																0
																0
																0
																0
																0
																0
																0
																0
																0
																0
																0
																0
																0
																0
																0
																0
																0
																0
																0
																0
																0
																0
																0
																0
																0
																0
																0
																0
																0
																0
																0
																0
																0
																0
																0
																0
																0
																0
																0
																0
																0
																0
																0
																0
																0
																0
																0
																0
																0
																0
																0
																0
																0
																0
																0
																0
																0
																0
																0
																0
																0
																0
																0
																0
																0
																0
																0
																0
																0
																0
																0
																0
																0
																0
																0
																0
																0
																0
																0
																0
																0
																0
																0
																0
																0
																0
																0
																0
																0
																0
																0
																0
																0
																0
																0
																0
																0
																0
																0
																0
																0
																0
																0
																0
																0
																0
																0
																0
																0
																0
																0
																0
																0
																0
																0
																0
																0
																0
																0
																0
																0
																0
																0
																0
																0
																0
																0
																0
																0
																0
																0
																0
																0
																0
																0
																0
																0
																0
																0
																0
																0
																0
																0
																0
																0
																0
																0
																0
																0
																0
																0
																0
																0
																0
																0
																0
																0
																0
																0
																0
																0
																0
																0
																0
																0
																0
																0
																0
																0
																0
																0
																0
																0
																0
																0
																0
																0
																0
																0
																0
																0
																0
																0
																0
																0
																0
																0
																0
																0
																0
																0
																0
																0
																0
																0
																0
																0
																0
																0
																0
																0
																0
																0
																0
																0
																0
																0
																0
																0
																0
																0
																0
																0
																0
																0
																0
																0
																0
																0
																0
																0
																0
																0
																0
																0
																0
																0
																0
																0
																0
																0
																0
																0
																0
																0
																0
																0
																0
																0
																0
																0
																0
																0
																0
																0
																0
																0
																0
																0
																0
																0
																0
																0
																0
																0
																0
																0
																0
																0
																0
																0
																0
																0
																0
																0
																0
																0
																0
																0
																0
																0
																0
																0
																0
																0
																0
																0
																0
																0
																0
																0
																0
																0
																0
																0
																0
																0
																0
																0
																0
																0
																0
																0
																0
																0
																0
																0
																0
																0
																0
																0
																0
																0
																0
																0
																0
																0
																0
																0
																0
																0
																0
																0
																0
																0
																0
																0
																0
																0
																0
																0
																0
																0
																0
																0
																0
																0
																0
																0
																0
																0
																0
																0
																0
																0
																0
																0
																0
																0
																0
																0
																0
																0
																0
																0
																0
																0
																0
																0
																0
																0
																0
																0
																0
																0
																0
																0
																0
																0
																0
																0
																0
																0
																0
																0
																0
																0
																0
																0
																0
																0
																0
																0
																0
																0
																0
																0
																0
																0
																0
																0
																0
																0
																0
																0
																0
																0
																0
																0
																0
																0
																0
																0
																0
																0
																0
																0
																0
																0
																0
																0
																0
																0
																0
																0
																0
																0
																0
																0
																0
																0
																0
																0
																0
																0
																0
																0
																0
																0
																0
																0
																0
																0
																0
																0
																0
																0
																0
																0
																0
																0
																0
																0
																0
																0
																0
																0
																0
																0
																0
																0
																0
																0
																0
																0
																0
																0
																0
																0
																0
																0
																0
																0
																0
																0
																0
																0
																0
																0
																0
																0
																0
																0
																0
																0
																0
																0
																0
																0
																0
																0
																0
																0
																0
																0
																0
																0
																0
																0
																0
																0
																0
																0
																0
																0
																0
																0
																0
																0
																0
																0
																0
																0
																0
																0
																0
																0
																0
																0
																0
																0
																0
																0
																0
																0
																0
																0
																0
																0
																0
																0
																0
																0
																0
																0
																0
																0
																0
																0
																0
																0
																0
																0
																0
																0
																0
																0
																0
																0
																0
																0
																0
																0
																0
																0
																0
																0
																0
																0
																0
																0
																0
																0
																0
																0
																0
																0
																0
																0
																0
																0
																0
																0
																0
																0
																0
																0
																0
																0
																0
																0
																0
																0
																0
																0
																0
																0
																0
																0
																0
																0
																0
																0
																0
																0
																0
																0
																0
																0
																0
																0
																0
																0
																0
																0
																0
																0
																0
																0
																0
																0
																0
																0
																0
																0
																0
																0
																0
																0
																0
																0
																0
																0
																0
																0
																0
																0
																0
																0
																0
																0
																0
																0
																0
																0
																0
																0
																0
																0
																0
																0
																0
																0
																0
																0
																0
																0
																0
																0
																0
																0
																0
																0
																0
																0
																0
																0
																0
																0
																0
																0
																0
																0
																0
																0
																0
																0
																0
																0
																0
																0
																0
																0
																0
																0
																0
																0
																0
																0
																0
																0
																0
																0
																0
																0
																0
																0
																0
																0
																0
																0
																0
																0
																0
																0
																0
																0
																0
																0
																0
																0
																0
																0
																0
																0
																0
																0
																0
																0
																0
																0
																0
																0
																0
																0
																0
																0
																0
																0
																0
																0
																0
																0
																0
																0
																0
																0
																0
																0
																0
																0
																0
																0
																0
																0
																0
																0
																0
																0
																0
																0
																0
																0
																0
																0
																0
																0
																0
																0
																0
																0
																0
																0
																0
																0
																0
																0
																0
																0
																0
																0
																0
																0
																0
																0
																0
																0
																0
																0
																0
																0
																0
																0
																0
																0
																0
																0
																0
																0
																0
																0
																0
																0
																0
																0
																0
																0
																0
																0
																0
																0
																0
																0
																0
																0
																0
																0
																0
																0
																0
																0
																0
																0
																0
																0
																0
																0
																0
																0
																0
																0
																0
																0
																0
																0
																0
																0
																0
																0
																0
																0
																0
																0
																0
																0
																0
																0
																0
																0
																0
																0
																0
																0
																0
																0
																0
																0
																0
																0
																0
																0
																0
																0
																0
																0
																0
																0
																0
																0
																0
																0
																0
																0
																0
																0
																0
																0
																0
																0
																0
																0
																0
																0
																0
																0
																0
																0
																0
																0
																0
																0
																0
																0
																0
																0
																0
																0
																0
																0
																0
																0
																0
																0
																0
																0
																0
																0
																0
																0
																0
																0
																0
																0
																0
																0
																0
																0
																0
																0
																0
																0
																0
																0
																0
																0
																0
																0
																0
																0
																0
																0
																0
																0
																0
																0
																0
																0
																0
																0
																0
																0
																0
																0
																0
																0
																0
																0
																0
																0
																0
																0
																0
																0
																0
																0
																0
																0
																0
																0
																0
																0
																0
																0
																0
																0
																0
																0
																0
																0
																0
																0
																0
																0
																0
																0
																0
																0
																0
																0
																0
																0
																0
																0
																0
																0
																0
																0
																0
																0
																0
																0
																0
																0
																0
																0
																0
																0
																0
																0
																0
																0
																0
																0
																0
																0
																0
																0
																0
																0
																0
																0
																0
																0
																0
																0
																0
																0
																0
																0
																0
																0
																0
																0
																0
																0
																0
																0
																0
																0
																0
																0
																0
																0
																0
																0
																0
																0
																0
																0
																0
																0
																0
																0
																0
																0
																0
																0
																0
																0
																0
																0
																0
																0
																0
																0
																0
																0
																0
																0
																0
																0
																0
																0
																0
																0
																0
																0
																0
																0
																0
																0
																0
																0
																0
																0
																0
																0
																0
																0
																0
																0
																0
																0
																0
																0
																0
																0
																0
																0
																0
																0
																0
																0
																0
																0
																0
																0
																0
																0
																0
																0
																0
																0
																0
																0
																0
																0
																0
																0
																0
																0
																0
																0
																0
																0
																0
																0
																0
																0
																0
																0
																0
																0
																0
																0
																0
																0
																0
																0
																0
																0
																0
																0
																0
																0
																0
																0
																0
																0
																0
																0
																0
																0
																0
																0
																0
																0
																0
																0
																0
																0
																0
																0
																0
																0
																0
																0
																0
																0
																0
																0
																0
																0
																0
																0
																0
																0
																0
																0
																0
																0
																0
																0
																0
																0
																0
																0
																0
																0
																0
																0
																0
																0
																0
																0
																0
																0
																0
																0
																0
																0
																0
																0
																0
																0
																0
																0
																0
																0
																0
																0
																0
																0
																0
																0
																0
																0
																0
																0
																0
																0
																0
																0
																0
																0
																0
																0
																0
																0
																0
																0
																0
																0
																0
																0
																0
																0
																0
																0
																0
																0
																0
																0
																0
																0
																0
																0
																0
																0
																0
																0
																0
																0
																0
																0
																0
																0
																0
																0
																0
																0
																0
																0
																0
																0
																0
																0
																0
																0
																0
																0
																0
																0
																0
																0
																0
																0
																0
																0
																0
																0
																0
																0
																0
																0
																0
																0
																0
																0
																0
																0
																0
																0
																0
																0
																0
																0
																0
																0
																0
																0
																0
																0
																0
																0
																0
																0
																0
																0
																0
																0
																0
																0
																0
																0
																0
																0
																0
																0
																0
																0
																0
																0
																0
																0
																0
																0
																0
																0
																0
																0
																0
																0
																0
																0
																0
																0
																0
																0
																0
																0
																0
																0
																0
																0
																0
																0
																0
																0
																0
																0
																0
																0
																0
																0
																0
																0
																0
																0
																0
																0
																0
																0
																0
																0
																0
																0
																0
																0
																0
																0
																0
																0
																0
																0
																0
																0
																0
																0
																0
																0
																0
																0
																0
																0
																0
																0
																0
																0
																0
																0
																0
																0
																0
																0
																0
																0
																0
																0
																0
																0
																0
																0
																0
																0
																0
																0
																0
																0
																0
																0
																0
																0
																0
																0
																0
																0
																0
																0
																0
																0
																0
																0
																0
																0
																0
																0
																0
																0
																0
																0
																0
																0
																0
																0
																0
																0
																0
																0
																0
																0
																0
																0
																0
																0
																0
																0
																0
																0
																0
																0
																0
																0
																0
																0
																0
																0
																0
																0
																0
																0
																0
																0
																0
																0
																0
																0
																0
																0
																0
																0
																0
																0
																0
																0
																0
																0
																0
																0
																0
																0
																0
																0
																0
																0
																0
																0
																0
																0
																0
																0
																0
																0
																0
																0
																0
																0
																0
																0
																0
																0
																0
																0
																0
																0
																0
																0
																0
																0
																0
																0
																0
																0
																0
																0
																0
																0
																0
																0
																0
																0
																0
																0
																0
																0
																0
																0
																0
																0
																0
																0
																0
																0
																0
																0
																0
																0
																0
																0
																0
																0
																0
																0
																0
																0
																0
																0
																0
																0
																0
																0
																0
																0
																0
																0
																0
																0
																0
																0
																0
																0
																0
																0
																0
																0
																0
																0
																0
																0
																0
																0
																0
																0
																0
																0
																0
																0
																0
																0
																0
																0
																0
																0
																0
																0
																0
																0
																0
																0
																0
																0
																0
																0
																0
																0
																0
																0
																0
																0
																0
																0
																0
																0
																0
																0
																0
																0
																0
																0
																0
																0
																0
																0
																0
																0
																0
																0
																0
																0
																0
																0
																0
																0
																0
																0
																0
																0
																0
																0
																0
																0
																0
																0
																0
																0
																0
																0
																0
																0
																0
																0
																0
																0
																0
																0
																0
																0
																0
																0
																0
																0
																0
																0
																0
																0
																0
																0
																0
																0
																0
																0
																0
																0
																0
																0
																0
																0
																0
																0
																0
																0
																0
																0
																0
																0
																0
																0
																0
																0
																0
																0
																0
																0
																0
																0
																0
																0
																0
																0
																0
																0
																0
																0
																0
																0
																0
																0
																0
																0
																0
																0
																0
																0
																0
																0
																0
																0
																0
																0
																0
																0
																0
																0
																0
																0
																0
																0
																0
																0
																0
																0
																0
																0
																0
																0
																0
																0
																0
																0
																0
																0
																0
																0
																0
																0
																0
																0
																0
																0
																0
																0
																0
																0
																0
																0
																0
																0
																0
																0
																0
																0
																0
																0
																0
																0
																0
[truncated: 1,046,576+ more rows]
